# Supplementary material for: Pyridyl thioureas as switchable anion receptors
Source: Royal Society of Chemistry journal article supplement (doi:10.1039/b611138f), 2006-01-01
Supplement: b611138f.pdf [file b611138f.pdf]

## **Pyridyl thioureas as switchable anion receptors.**

Suad Rashdan, Mark E. Light and Jeremy D. Kilburn\*

[\*] Prof. J. D. Kilburn, S. Rashdan, Dr. Mark E. Light,  
School of Chemistry, University of Southampton, Southampton, SO17  
1BJ, U.K.

Fax: (+44)-2380-596805

E-mail: [jdk1@soton.ac.uk](mailto:jdk1@soton.ac.uk)

### ELECTRONIC SUPPLEMENTARY INFORMATION:

- a) NMR titration data for **1** with TBA acetate in CD<sub>3</sub>CN
- b) NMR titration data for **3d** with TBA bromide in CD<sub>3</sub>CN
- c) NMR titration data for **3d** with TBA chloride in CD<sub>3</sub>CN
- d) NMR titration data for **4a** with TBA bromide in CD<sub>3</sub>CN
- e) NMR titration data for **4a** with TBA chloride in CD<sub>3</sub>CN
- f) Crystal structure of **3a**
- g) Crystal structure of **3b**

a) NMR titration data for **1** with TBA acetate in CD<sub>3</sub>CN

Thiourea **1** with TBAOAc

[H]=0.00873 [G]=0.07349

| No | Vol | [[G]        | EqG         | CHpy4 |
|----|-----|-------------|-------------|-------|
| 1  | 10  | 0.001204754 | 0.138001615 | 7.052 |
| 2  | 20  | 0.002370645 | 0.271551565 | 7.146 |
| 3  | 30  | 0.003499524 | 0.400861834 | 7.19  |
| 4  | 40  | 0.004593125 | 0.526131157 | 7.291 |
| 5  | 50  | 0.005653077 | 0.647546039 | 7.324 |
| 6  | 60  | 0.006680909 | 0.765281683 | 7.37  |
| 7  | 70  | 0.00767806  | 0.879502829 | 7.433 |
| 8  | 80  | 0.008645882 | 0.990364531 | 7.454 |
| 9  | 90  | 0.009585652 | 1.098012849 | 7.482 |
| 10 | 100 | 0.010498571 | 1.202585502 | 7.515 |
| 11 | 110 | 0.011385775 | 1.304212445 | 7.548 |
| 12 | 120 | 0.012248333 | 1.403016418 | 7.61  |
| 13 | 130 | 0.01308726  | 1.499113433 | 7.63  |
| 14 | 140 | 0.013903514 | 1.592613232 | 7.635 |
| 15 | 150 | 0.014698    | 1.683619702 | 7.66  |
| 16 | 170 | 0.016225065 | 1.85854123  | 7.7   |
| 17 | 200 | 0.0183725   | 2.104524628 | 7.75  |
| 18 | 240 | 0.020997143 | 2.405171003 | 7.78  |
| 19 | 280 | 0.023383182 | 2.67848589  | 7.8   |
| 20 | 320 | 0.025561739 | 2.928034265 | 7.82  |
| 21 | 360 | 0.02755875  | 3.156786942 | 7.853 |
| 22 | 400 | 0.029396    | 3.367239404 | 7.87  |

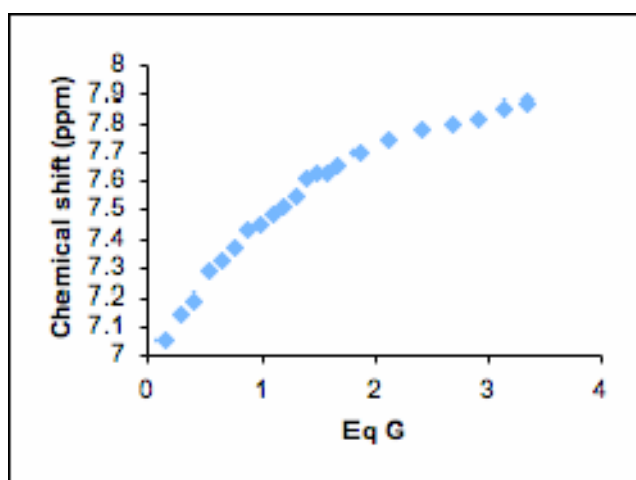

b) NMR titration data for **3d** with TBA bromide in CD<sub>3</sub>CN

[G] = 0.0383  
 [H] = 0.00681

| No | Vol | [G]      | [G]/[H]  | NH1   | NH2   | Hpy2  |
|----|-----|----------|----------|-------|-------|-------|
| 1  | 0   | 0        | 0        | 9.35  | 9.88  | 8.32  |
| 2  | 10  | 0.000628 | 0.092198 | 9.39  | 10.1  | 8.32  |
| 3  | 20  | 0.001235 | 0.181422 | 9.54  | 10.31 | 8.3   |
| 4  | 30  | 0.001824 | 0.267813 | 9.86  | 10.85 | 8.29  |
| 5  | 40  | 0.002394 | 0.351505 | 10.16 | 11.11 | 8.27  |
| 6  | 50  | 0.002946 | 0.432622 | 10.46 | 11.75 | 8.27  |
| 7  | 60  | 0.003482 | 0.51128  | 10.69 | 12.02 | 8.26  |
| 8  | 70  | 0.004001 | 0.587591 | 10.86 | 12.32 | 8.26  |
| 9  | 80  | 0.004506 | 0.661657 | 11.05 | 12.65 | 8.25  |
| 10 | 90  | 0.004996 | 0.733576 | 11.22 | 12.94 | 8.25  |
| 11 | 110 | 0.005934 | 0.871337 | 11.57 | 13.34 | 8.25  |
| 12 | 120 | 0.006383 | 0.937347 | 11.62 | 13.39 | 8.25  |
| 13 | 130 | 0.006821 | 1.001549 | 11.67 | 13.39 | 8.26  |
| 14 | 140 | 0.007246 | 1.064016 | 11.67 | 13.42 | 8.26  |
| 15 | 150 | 0.00766  | 1.124816 | 11.64 | 13.42 | 8.27  |
| 16 | 190 | 0.009211 | 1.352627 | 11.67 | 13.42 | 8.27  |
| 17 | 210 | 0.00993  | 1.458095 | 11.65 | 13.5  | 8.273 |
| 18 | 250 | 0.011265 | 1.654142 | 11.65 | 13.45 | 8.274 |
| 19 | 290 | 0.01248  | 1.832566 | 11.65 | 13.46 | 8.275 |

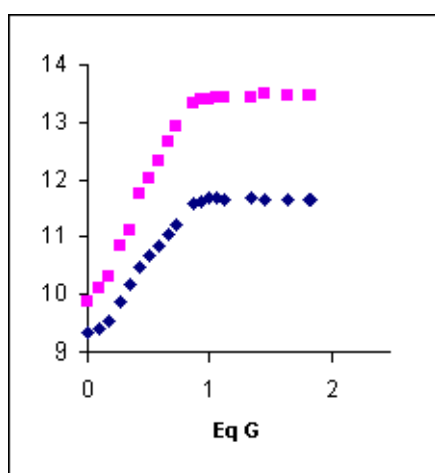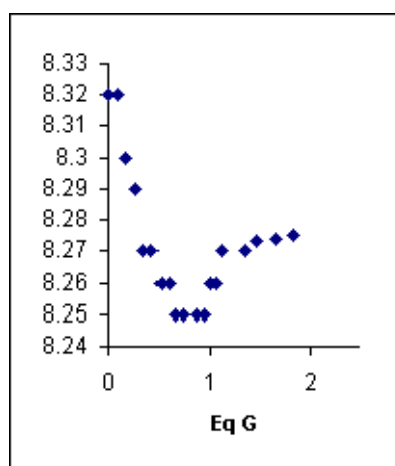

c) NMR titration data for **3d** with TBA chloride in CD<sub>3</sub>CN

$$[G] = \quad \quad \quad 0.0438[H] = \quad \quad \quad 0.00631$$

| <b>No</b> | <b>Vol</b> | <b>[G]</b> | <b>[G]/[H]</b> | <b>NH1</b> | <b>NH2</b> | <b>Hpy1</b> |
|-----------|------------|------------|----------------|------------|------------|-------------|
| 1         | 0          | 0          | 0              | 9.833      | 9.248      | 8.32        |
| 2         | 10         | 0.000719   | 0.114012       | 10.235     | 9.706      | 8.32        |
| 3         | 20         | 0.001416   | 0.224346       | 10.995     | 10.196     | 8.3         |
| 4         | 30         | 0.00209    | 0.331177       | 11.453     | 10.509     | 8.288       |
| 5         | 40         | 0.002743   | 0.43467        | 11.84      | 10.789     | 8.281       |
| 6         | 50         | 0.003376   | 0.534979       | 12.305     | 11.036     | 8.274       |
| 7         | 60         | 0.003989   | 0.632247       | 12.698     | 11.356     | 8.263       |
| 8         | 70         | 0.004585   | 0.726613       | 13.131     | 11.668     | 8.257       |
| 9         | 80         | 0.005163   | 0.818203       | 13.391     | 11.841     | 8.244       |
| 10        | 90         | 0.005724   | 0.907138       | 13.68      | 12.038     | 8.237       |
| 11        | 100        | 0.006269   | 0.993532       | 13.75      | 12.164     | 8.237       |
| 12        | 110        | 0.006799   | 1.077492       | 13.76      | 12.186     | 8.236       |
| 13        | 120        | 0.007314   | 1.15912        | 13.606     | 12.244     | 8.235       |
| 14        | 130        | 0.007815   | 1.238512       | 13.542     | 12.278     | 8.238       |
| 15        | 150        | 0.008777   | 1.390944       | 13.38      | 12.35      | 8.243       |
| 16        | 170        | 0.009689   | 1.535458       | 13.224     | 12.39      | 8.246       |
| 17        | 200        | 0.010971   | 1.738681       | 13.067     | 12.446     | 8.252       |
| 18        | 240        | 0.012538   | 1.987064       | br         | 12.518     | 8.258       |
| 19        | 280        | 0.013963   | 2.212866       | br         | 12.55      | 8.264       |
| 20        | 320        | 0.015264   | 2.419034       | br         | 12.61      | 8.268       |
| 21        | 360        | 0.016457   | 2.608021       | br         | 12.64      | 8.271       |
| 22        | 400        | 0.017554   | 2.781889       | br         | 12.64      | 8.276       |

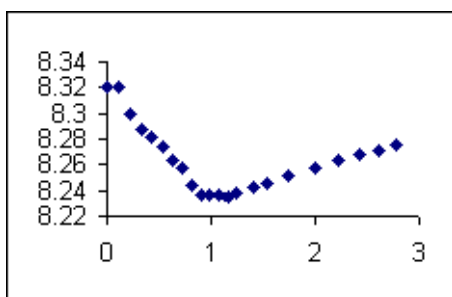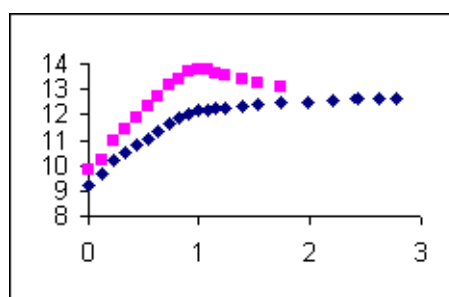

d) NMR titration data for **4a** with TBA bromide in CD<sub>3</sub>CN

[G] = 0.0843  
[H] = 0.00631

| No | Vol | [G]      | [G]/[H]  | NH1    | NH2    | Hpy1  |
|----|-----|----------|----------|--------|--------|-------|
| 1  | 0   | 0        | 0        | 9.558  | 8.888  | 8.233 |
| 2  | 10  | 0.001382 | 0.219028 | 10.469 | 9.501  | 8.216 |
| 3  | 20  | 0.00272  | 0.430991 | 11.293 | 9.993  | 8.2   |
| 4  | 30  | 0.004015 | 0.636225 | 12.008 | 10.524 | 8.183 |
| 5  | 40  | 0.005269 | 0.835046 | 12.597 | 10.975 | 8.169 |
| 6  | 50  | 0.006485 | 1.027749 | 12.832 | 11.107 | 8.164 |
| 7  | 60  | 0.007664 | 1.214612 | 12.941 | 11.161 | 8.165 |
| 8  | 70  | 0.008808 | 1.395897 | 12.96  | 11.165 | 8.167 |
| 9  | 80  | 0.009918 | 1.571851 | 12.99  | 11.161 | 8.167 |
| 10 | 90  | 0.010996 | 1.742704 | 12.97  | 11.187 | 8.169 |
| 11 | 100 | 0.012044 | 1.908676 | 12.99  | 11.18  | 8.171 |
| 12 | 120 | 0.014051 | 2.226789 | 12.99  | 11.174 | 8.174 |
| 13 | 140 | 0.01595  | 2.527706 | 13     | 11.195 | 8.178 |
| 14 | 160 | 0.017749 | 2.812786 | 12.98  | 11.182 | 8.183 |
| 15 | 180 | 0.019455 | 3.083246 | 12.99  | 11.187 | 8.185 |
| 16 | 200 | 0.021077 | 3.340183 | 13.01  | 11.181 | 8.188 |
| 17 | 240 | 0.024087 | 3.817352 | 12.99  | 11.189 | 8.194 |
| 18 | 280 | 0.026825 | 4.251142 | 12.99  | 11.189 | 8.2   |
| 19 | 320 | 0.029324 | 4.647211 | 12.99  | 11.161 | 8.204 |
| 20 | 400 | 0.033722 | 5.344293 | 12.99  | 11.165 | 8.211 |

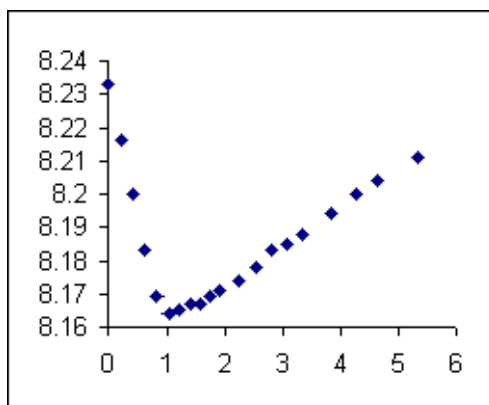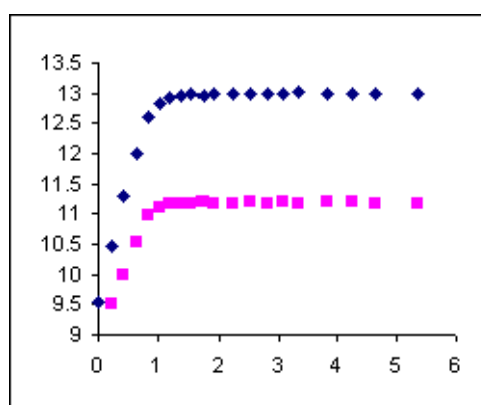

e) NMR titration data for **4a** with TBA chloride in CD<sub>3</sub>CN

[G] = 0.04349 [H] = 0.006706

| <u>No</u> | <u>Vol</u> | <u>[G]</u> | <u>[G]/[H]</u> | <u>NH1</u> | <u>NH2</u> | <u>Hpy1</u> |
|-----------|------------|------------|----------------|------------|------------|-------------|
| 1         | 0          | 0          | 0              | 9.6        | 8.91       | 8.23        |
| 2         | 10         | 0.000713   | 0.106315       | 9.95       | 9.08       | 8.22        |
| 3         | 20         | 0.001403   | 0.209201       | 10.39      | 9.36       | 8.218       |
| 4         | 30         | 0.002071   | 0.308821       | 10.93      | 9.7        | 8.2         |
| 5         | 40         | 0.002718   | 0.405327       | 11.45      | 10.13      | 8.196       |
| 6         | 50         | 0.003345   | 0.498864       | 11.89      | 10.41      | 8.187       |
| 7         | 60         | 0.003954   | 0.589567       | 12.25      | 10.65      | 8.179       |
| 8         | 70         | 0.004544   | 0.677562       | 12.64      | 11.03      | 8.169       |
| 9         | 80         | 0.005116   | 0.762969       | 13.07      | 11.3       | 8.157       |
| 10        | 90         | 0.005673   | 0.8459         | 13.29      | 11.51      | 8.149       |
| 11        | 100        | 0.006213   | 0.926462       | 13.58      | 11.67      | 8.144       |
| 12        | 110        | 0.006738   | 1.004755       | 13.63      | 11.67      | 8.145       |
| 13        | 120        | 0.007248   | 1.080873       | 13.65      | 11.63      | 8.147       |
| 14        | 130        | 0.007745   | 1.154905       | 13.66      | 11.54      | 8.149       |
| 15        | 140        | 0.008228   | 1.226937       | 13.66      | 11.5       | 8.152       |
| 16        | 150        | 0.008698   | 1.297047       | 13.66      | 11.47      | 8.16        |
| 17        | 160        | 0.009156   | 1.365313       | 13.66      | 11.46      | 8.156       |
| 18        | 180        | 0.010036   | 1.496593       | 13.66      | 11.45      | 8.158       |
| 19        | 200        | 0.010873   | 1.621309       | 13.66      | 11.39      | 8.163       |
| 20        | 240        | 0.012426   | 1.852925       | 13.66      | 11.25      | 8.168       |
| 21        | 280        | 0.013838   | 2.063485       | 13.66      | 11.18      | 8.173       |
| 22        | 320        | 0.015127   | 2.255735       | 13.65      | 11.11      | 8.177       |
| 23        | 360        | 0.016309   | 2.431964       | 13.65      | 11.1       | 8.181       |

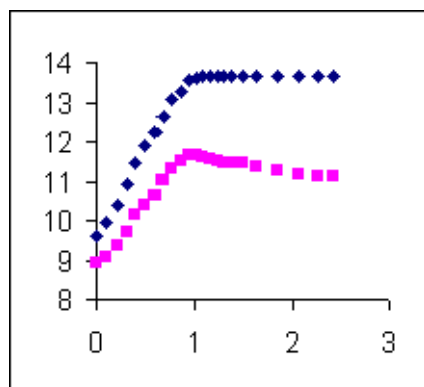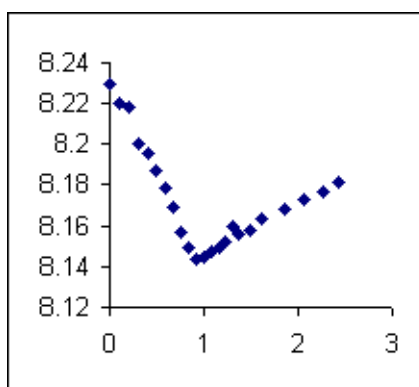

f) Crystal structure of 3a

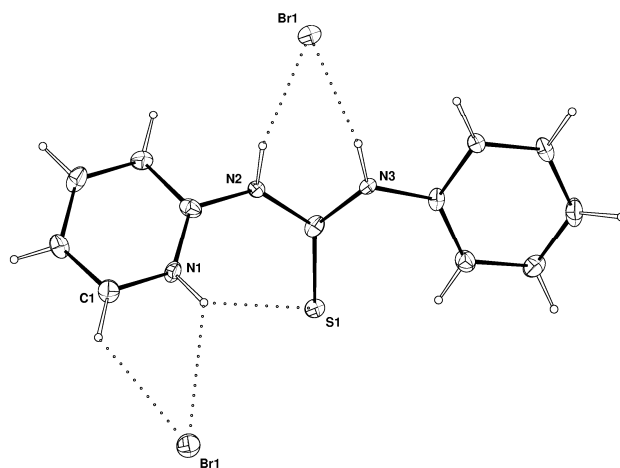

**Crystal data for 3a:**  $C_{12}H_{12}N_3SBr$ ,  $M = 310.22$ , colourless block,  $0.2 \times 0.15 \times 0.08 \text{ mm}^3$ , monoclinic, space group  $P2_1/c$ ,  $a = 7.2182(15)$ ,  $b = 13.451(4)$ ,  $c = 13.041(4) \text{ \AA}$ ,  $\beta = 97.126(18)^\circ$ ,  $V = 1256.4(6) \text{ \AA}^3$ ,  $Z = 4$ ,  $D_c = 1.640 \text{ g/cm}^3$ ,  $F_{000} = 624$ ,  $2\theta_{\text{max}} = 54.96^\circ$ , 12582 reflections collected, not merged. Final  $Goof = 1.076$ ,  $R1 = 0.0629$ ,  $wR2 = 0.1450$ ,  $R$  indices based on 12587 reflections with  $I > 2\sigma(I)$ , 155 parameters, 0 restraints,  $T_{\text{min}} = 0.5480$ ,  $T_{\text{max}} = 0.7716$ ,  $\mu = 3.418 \text{ mm}^{-1}$ . Residual electron density  $0.889 \text{ e/\AA}^3$ . The crystal was a non-merohedral twin ( $180^\circ$  rotation about the 00-1 reciprocal lattice vector) CCDC deposition number 603099.

f) Crystal structure of 3b

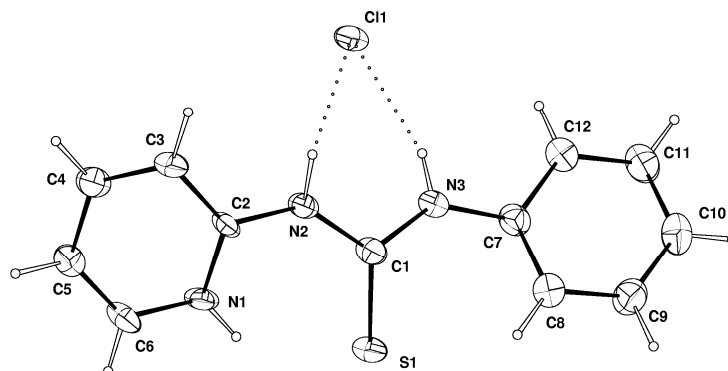

**Crystal data for 3b:**  $C_{12}H_{12}N_3SCl$ ,  $M = 265.76$ , colourless plate,  $0.18 \times 0.08 \times 0.01 \text{ mm}^3$ , monoclinic, space group  $P2_1$ ,  $a = 4.8778(10)$ ,  $b = 8.0177(16)$ ,  $c = 16.085(3) \text{ \AA}$ ,  $\beta = 90.43(3)^\circ$ ,  $V = 629.0(2) \text{ \AA}^3$ ,  $Z = 2$ ,  $D_c = 1.403 \text{ g/cm}^3$ ,  $F_{000} = 276$ ,  $2\theta_{\text{max}} = 54.94^\circ$ , 7779 reflections collected, 2745 unique ( $R_{\text{int}} = 0.106$ ). Final  $GooF = 1.097$ ,  $RI = 0.0736$ ,  $wR2 = 0.1778$ ,  $R$  indices based on 2745 reflections with  $I > 2\sigma(I)$ , 154 parameters, 1 restraints. ,  $T_{\text{min}} = 0.9234$ ,  $T_{\text{max}} = 0.9978$   $\mu = 0.45 \text{ mm}^{-1}$ . Residual electron density  $0.922 \text{ e/\AA}^3$ , absolute structure parameter =  $0.28(15)$ . CCDC deposition number 603098.
